# Supplementary material
Source: Elsevier journal article supplement (https://www.eyewideopen.org/wp-content/uploads/2022/10/mmc1.pdf)
Supplement: mmc1 [file mmc1.pdf]

# THE LANCET

## Diabetes & Endocrinology

### Supplementary appendix 1

This appendix formed part of the original submission and has been peer reviewed.  
We post it as supplied by the authors.

Supplement to: Piernas C, Patone M, Astbury NM, et al. Associations of BMI with COVID-19 vaccine uptake, vaccine effectiveness, and risk of severe COVID-19 outcomes after vaccination in England: a population-based cohort study. *Lancet Diabetes Endocrinol* 2022; published online June 30. [https://doi.org/10.1016/S2213-8587\(22\)00158-9](https://doi.org/10.1016/S2213-8587(22)00158-9).

# Associations of body mass index with COVID-19 vaccine uptake, vaccine effectiveness and risk of severe COVID-19 outcomes after vaccination: population-based cohort of 9 million people in England

## Contents

|                                                                                                                                                                     |    |
|---------------------------------------------------------------------------------------------------------------------------------------------------------------------|----|
| Supplementary Appendix 1 – Methods .....                                                                                                                            | 2  |
| Supplementary Appendix 1 – Figures and Tables .....                                                                                                                 | 3  |
| Supplementary Figure 1. Study flow diagram. ....                                                                                                                    | 3  |
| Supplementary Table 1 – Demographic characteristics by BMI .....                                                                                                    | 4  |
| Supplementary Table 2 – Demographic characteristics by vaccination status .....                                                                                     | 5  |
| Supplementary Table 3. Percentage of population with one, two or three vaccine doses by BMI and age group.....                                                      | 6  |
| Supplementary Table 4. Cox proportional hazards of vaccination across BMI groups....                                                                                | 7  |
| Supplementary Table 5. Vaccine effectiveness against COVID-19 Hospital admission using a case-control study design.....                                             | 8  |
| Supplementary Table 6. Vaccine effectiveness against COVID-19 death using a case-control study design.....                                                          | 9  |
| Supplementary Table 7. Vaccine effectiveness against COVID-19 positive test using a case-control study design.....                                                  | 10 |
| Supplementary Figure 2. Risk of COVID-19 positive test after vaccination .....                                                                                      | 11 |
| Supplementary Figure 3. Sensitivity analysis of vaccine effectiveness against COVID-19 hospital admission and death among people with recent BMI measurements ..... | 12 |
| Supplementary Figure 4. Sensitivity analysis of vaccine effectiveness against COVID-19 hospital admission and death excluding people living in care homes.....      | 13 |
| Supplementary Figure 5. Sensitivity analysis of risk of severe COVID-19 outcomes after vaccination among people with recent BMI measurements .....                  | 14 |
| Supplementary Figure 6. Sensitivity analysis of risk of severe COVID-19 outcomes after vaccination excluding people living in care homes .....                      | 15 |

## Supplementary Appendix 1 – Methods

### Supplementary Methods 1 – Case control study design, matching and sample characteristics

For the vaccine effectiveness analyses, a nested matched case-control design was used to estimate odds ratios with 95% confidence intervals (OR and 95% CI) for each of the COVID-19 outcomes in vaccinated versus non-vaccinated people. Each participant with a COVID-19 outcome was exactly matched by age, sex, calendar date, practice, region and care home status to controls without evidence of a COVID-19 outcome on that date, with a predetermined ratio of 1:10 cases to controls drawn from the entire population using incidence density sampling with replacement (a selected control was eligible to be selected again as a control for another case providing this person is free of disease). Participants entered the analyses on December 8, 2020 and were censored on the earliest of date of outcome of interest, death from other causes, or the latest date for which data were available. Conditional logistic regression models included an interaction between vaccination status and BMI categories, and were adjusted for ethnicity, Townsend score, smoking status and co-morbidities. Likelihood ratio tests were computed to determine P values for heterogeneity across BMI groups.

#### Matching of cases and controls

The matching used predetermined ratio of 1:10 cases to controls. However, the final number of matched controls to each case in each set was as follows:

1. COVID-19 Hospital admission: A total of 276,050 controls (93%) were included in sets of 11 participants; 14,701 controls (5%) were included in sets of 7-10 participants; 7,048 controls (2%) were included in sets of 2-6 participants.

1. COVID-19 Death: A total of 99,200 controls (86%) were included in sets of 11 participants; 9,535 controls (8%) were included in sets of 7-10 participants; 6,040 controls (5%) were included in sets of 2-6 participants.

#### Characteristics of cases and controls

| Characteristics            | COVID-19 Hospital admission |                       | COVID-19 Death    |                       |
|----------------------------|-----------------------------|-----------------------|-------------------|-----------------------|
|                            | Cases<br>N=32,808           | Controls<br>N=297,799 | Cases<br>N=14,389 | Controls<br>N=114,775 |
| Age, mean (SD)             | 66.2 (20.2)                 | 64.3 (19.7)           | 79.3 (12.7)       | 77.0 (12.5)           |
| Sex (% men)                | 50.3                        | 49.9                  | 54.8              | 55.6                  |
| BMI, mean (SD)             | 28.9 (6.4)                  | 27.2 (5.4)            | 28.3 (6.3)        | 27.4 (5.1)            |
| Ethnicity (% Whites)       | 65.7                        | 67.5                  | 67.5              | 69.8                  |
| Townsend quintile (%)      |                             |                       |                   |                       |
| 1                          | 19.4                        | 24.2                  | 22.5              | 28.0                  |
| 3                          | 20.7                        | 19.5                  | 20.7              | 19.4                  |
| 5                          | 18.8                        | 16.2                  | 15.1              | 12.6                  |
| Smoking (%)                |                             |                       |                   |                       |
| Non smoker                 | 40.7                        | 56.1                  | 11.9              | 55.2                  |
| Ex-smoker                  | 24.1                        | 28.3                  | 10.2              | 33.8                  |
| Light smoker               | 7.7                         | 11.0                  | 2.0               | 7.6                   |
| Moderate smoker            | 1.5                         | 2.4                   | 0.4               | 1.6                   |
| Heavy smoker               | 0.8                         | 1.3                   | 0.3               | 1.0                   |
| Not recorded               | 25.2                        | 0.9                   | 75.1              | 0.9                   |
| Type 2 Diabetes (%)        | 24.6                        | 13.7                  | 31.9              | 18.9                  |
| Type 1 Diabetes (%)        | 1.7                         | 0.6                   | 1.6               | 0.6                   |
| Cardiovascular disease (%) | 24.7                        | 15.1                  | 37.8              | 23.6                  |
| Hypertension (%)           | 45.0                        | 36.1                  | 61.0              | 51.8                  |

## Supplementary Appendix 1 – Figures and Tables

Supplementary Figure 1. Study flow diagram.

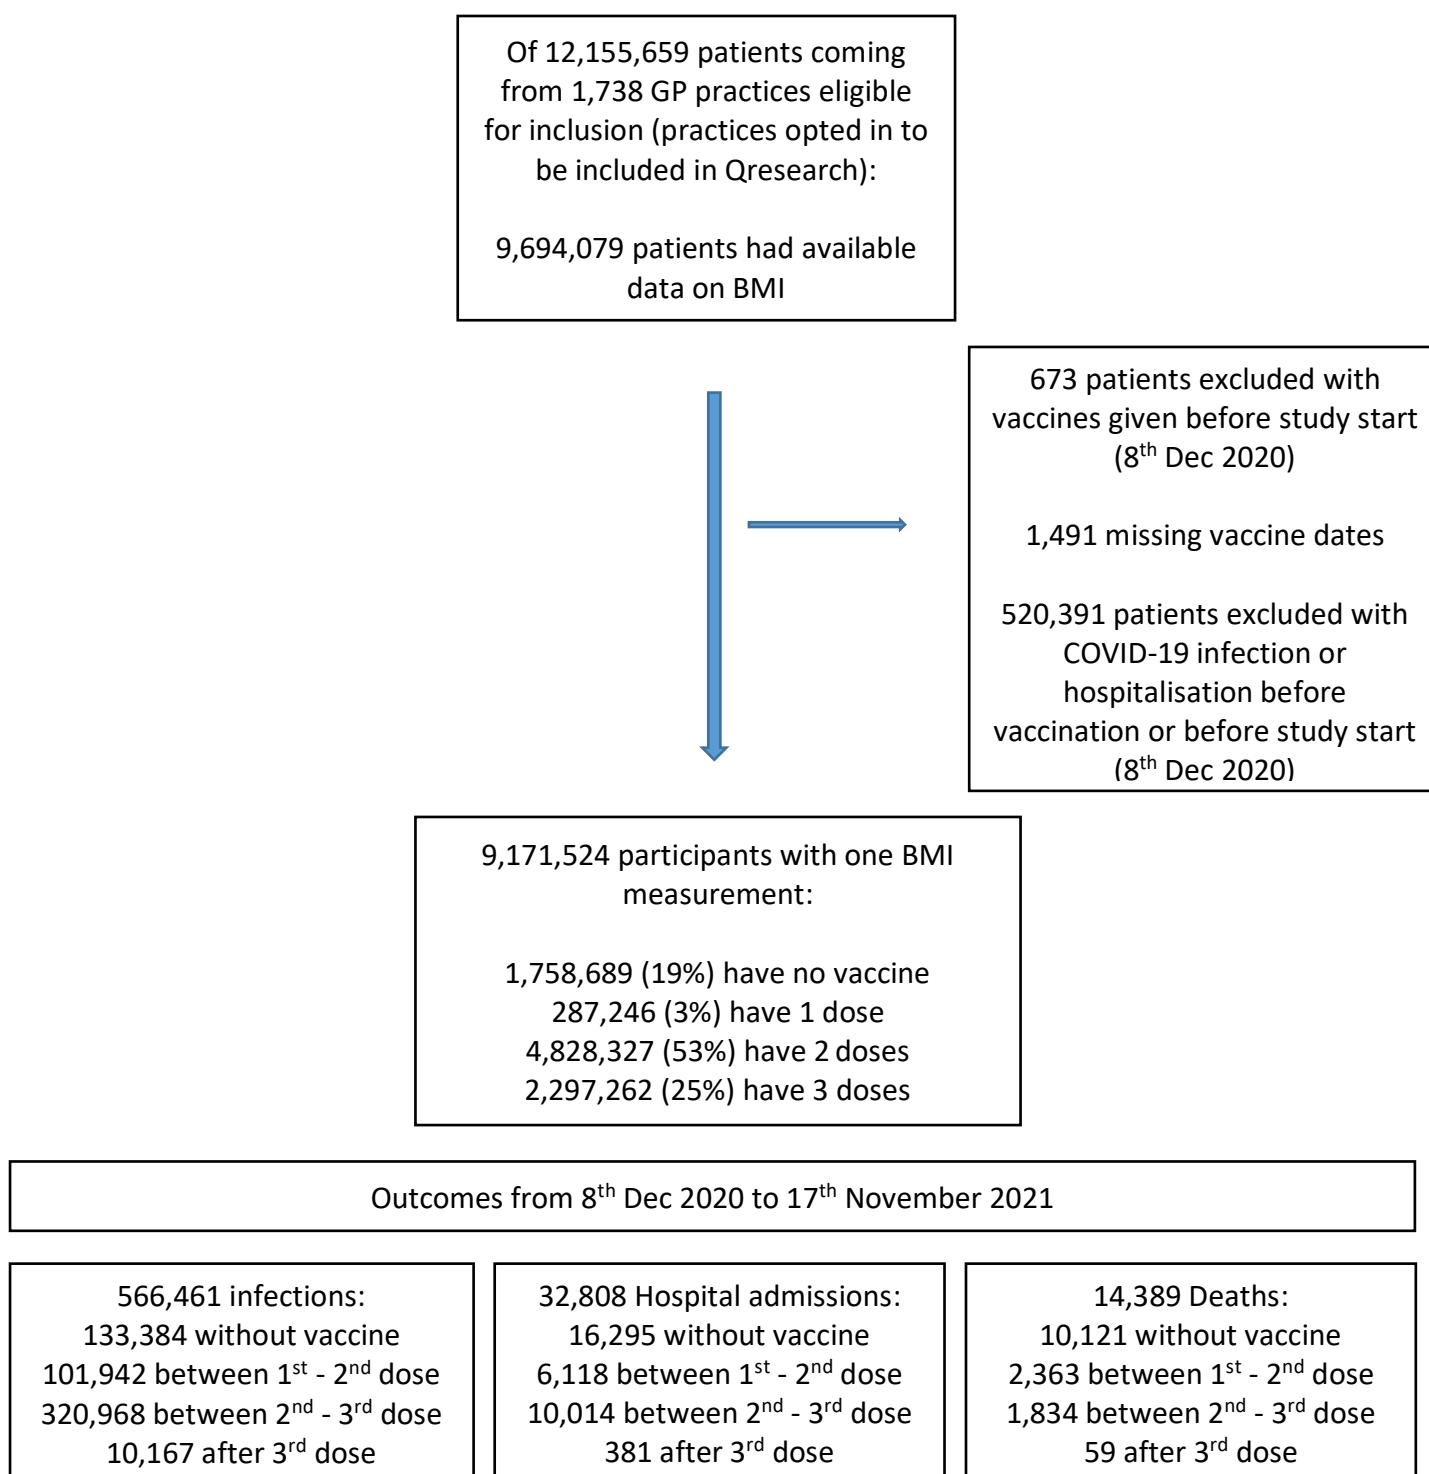

1. Hospital admission: defined as having ICD-10 code in hospital record for either confirmed (U07.1) or suspected COVID-19 (U07.2) as primary or secondary cause, or new hospital admission associated with confirmed COVID-19 within 14 days of the test;
2. Death: defined using ICD-10 codes on ONS death certificates for confirmed or suspected death from COVID-19 (primary or secondary cause) within 28 days of a laboratory confirmed COVID-19 infection.

Supplementary Table 1 – Demographic characteristics by BMI

|                             | Total Population | Underweight (<18.5) | healthy weight (18.5 to <25) | Overweight (25 to <30) | Obesity (30+)   |
|-----------------------------|------------------|---------------------|------------------------------|------------------------|-----------------|
| Total sample (n)            | 9171524          | 320737              | 3509213                      | 3062925                | 2278649         |
| COVID-19 Deaths             | 14389 (0.2%)     | 461 (0.1%)          | 4001 (0.1%)                  | 4688 (0.2%)            | 5239 (0.2%)     |
| COVID-19 Hospital admission | 32808 (0.4%)     | 796 (0.2%)          | 8315 (0.2%)                  | 10653 (0.3%)           | 13044 (0.6%)    |
| COVID-19 Positive test      | 566461 (6.2%)    | 22403 (7.0%)        | 215852 (6.2%)                | 180380 (5.9%)          | 147826 (6.5%)   |
| Vaccine doses               |                  |                     |                              |                        |                 |
| 0                           | 1758689 (19.2%)  | 104488 (32.6%)      | 817741 (23.3%)               | 513570 (16.8%)         | 322890 (14.2%)  |
| 1                           | 287246 (3.1%)    | 20303 (6.3%)        | 121348 (3.5%)                | 82473 (2.7%)           | 63122 (2.8%)    |
| 2                           | 4828327 (52.6%)  | 163844 (51.1%)      | 1851750 (52.8%)              | 1589893 (51.9%)        | 1222840 (53.7%) |
| 3                           | 2297262 (25.0%)  | 32102 (10.0%)       | 718374 (20.5%)               | 876989 (28.6%)         | 669797 (29.4%)  |
| BMI, mean (SD)              | 26.7 (5.6)       | 17.2 (0.9)          | 22.2 (1.7)                   | 27.1 (1.5)             | 34.3 (4.1)      |
| Type 2 Diabetes             | 694218 (7.6%)    | 3854 (1.2%)         | 98830 (2.8%)                 | 231604 (7.6%)          | 359930 (15.8%)  |
| Type 1 Diabetes             | 59826 (0.7%)     | 1321 (0.4%)         | 20434 (0.6%)                 | 20862 (0.7%)           | 17209 (0.8%)    |
| Cardiovascular disease      | 605585 (6.6%)    | 9145 (2.9%)         | 152770 (4.4%)                | 235142 (7.7%)          | 208528 (9.2%)   |
| Hypertension                | 1792284 (19.5%)  | 16696 (5.2%)        | 371401 (10.6%)               | 665563 (21.7%)         | 738624 (32.4%)  |
| Age, mean (SD)              | 52 (19)          | 37 (19)             | 48 (19)                      | 55 (18)                | 55 (17)         |
| Sex (Men)                   | 4312323 (47.0%)  | 140307 (43.7%)      | 1494345 (42.6%)              | 1660888 (54.2%)        | 1016783 (44.6%) |
| Ethnicity                   |                  |                     |                              |                        |                 |
| White                       | 6070653 (66.2%)  | 175820 (54.8%)      | 2354826 (67.1%)              | 2038132 (66.5%)        | 1501875 (65.9%) |
| Asian                       | 676214 (7.4%)    | 33182 (10.3%)       | 165517 (4.7%)                | 256658 (8.4%)          | 220857 (9.7%)   |
| Black                       | 320681 (3.5%)    | 9635 (3.0%)         | 99777 (2.8%)                 | 111557 (3.6%)          | 99712 (4.4%)    |
| Chinese                     | 82387 (0.9%)     | 8220 (2.6%)         | 55113 (1.6%)                 | 15363 (0.5%)           | 3691 (0.2%)     |
| Others/not recorded         | 2021589 (22.0%)  | 93880 (29.3%)       | 833980 (23.8%)               | 641215 (20.9%)         | 452514 (19.9%)  |
| Quintile of Townsend        |                  |                     |                              |                        |                 |
| 1                           | 2267236 (24.7%)  | 61743 (19.3%)       | 868987 (24.8%)               | 823146 (26.9%)         | 513360 (22.5%)  |
| 2                           | 2008005 (21.9%)  | 59574 (18.6%)       | 745584 (21.2%)               | 700687 (22.9%)         | 502160 (22.0%)  |
| 3                           | 1770337 (19.3%)  | 61391 (19.1%)       | 651264 (18.6%)               | 583646 (19.1%)         | 474036 (20.8%)  |
| 4                           | 1586007 (17.3%)  | 65087 (20.3%)       | 603718 (17.2%)               | 494111 (16.1%)         | 423091 (18.6%)  |
| 5                           | 1498195 (16.3%)  | 71377 (22.3%)       | 621864 (17.7%)               | 448133 (14.6%)         | 356821 (15.7%)  |
| Missing/not recorded        | 41744 (0.5%)     | 1565 (0.5%)         | 17796 (0.5%)                 | 13202 (0.4%)           | 9181 (0.4%)     |
| Region                      |                  |                     |                              |                        |                 |
| East Midlands               | 399276 (4.4%)    | 17342 (5.4%)        | 159144 (4.5%)                | 130138 (4.2%)          | 92652 (4.1%)    |
| East of England             | 515578 (5.6%)    | 18234 (5.7%)        | 196429 (5.6%)                | 177451 (5.8%)          | 123464 (5.4%)   |
| London                      | 2142178 (23.4%)  | 82666 (25.8%)       | 893290 (25.5%)               | 691872 (22.6%)         | 474350 (20.8%)  |
| North East                  | 294670 (3.2%)    | 10166 (3.2%)        | 103092 (2.9%)                | 97771 (3.2%)           | 83641 (3.7%)    |
| North West                  | 1509804 (16.5%)  | 49689 (15.5%)       | 529315 (15.1%)               | 512505 (16.7%)         | 418295 (18.4%)  |
| South Central               | 1093980 (11.9%)  | 34728 (10.8%)       | 420876 (12.0%)               | 373959 (12.2%)         | 264417 (11.6%)  |
| South East                  | 897277 (9.8%)    | 28382 (8.8%)        | 350972 (10.0%)               | 302608 (9.9%)          | 215315 (9.4%)   |
| South West                  | 903423 (9.9%)    | 29825 (9.3%)        | 357861 (10.2%)               | 297544 (9.7%)          | 218193 (9.6%)   |
| West Midlands               | 985769 (10.7%)   | 32583 (10.2%)       | 335342 (9.6%)                | 339441 (11.1%)         | 278403 (12.2%)  |
| Yorkshire & Humber          | 429569 (4.7%)    | 17122 (5.3%)        | 162892 (4.6%)                | 139636 (4.6%)          | 109919 (4.8%)   |
| Smoking                     |                  |                     |                              |                        |                 |
| Non smoker                  | 5345262 (58.3%)  | 185677 (57.9%)      | 2108349 (60.1%)              | 1763721 (57.6%)        | 1287515 (56.5%) |
| Ex-smoker                   | 2102775 (22.9%)  | 32969 (10.3%)       | 668375 (19.0%)               | 779633 (25.5%)         | 621798 (27.3%)  |
| Light smoker                | 1204760 (13.1%)  | 52778 (16.5%)       | 520548 (14.8%)               | 372440 (12.2%)         | 258994 (11.4%)  |
| Moderate smoker             | 252775 (2.8%)    | 10695 (3.3%)        | 107362 (3.1%)                | 78195 (2.6%)           | 56523 (2.5%)    |
| Heavy smoker                | 119573 (1.3%)    | 4157 (1.3%)         | 46131 (1.3%)                 | 38443 (1.3%)           | 30842 (1.4%)    |
| Missing/not recorded        | 146379 (1.6%)    | 34461 (10.7%)       | 58448 (1.7%)                 | 30493 (1.0%)           | 22977 (1.0%)    |

Supplementary Table 2 – Demographic characteristics by vaccination status

|                             | Unvaccinated   | One vaccine dose | Two vaccine doses | Three vaccine doses |
|-----------------------------|----------------|------------------|-------------------|---------------------|
| Total sample (n)            | 1758689        | 287246           | 4828327           | 2297262             |
| COVID-19 Deaths             | 10121 (0.6%)   | 2361 (0.8%)      | 1848 (<1%)        | 59 (<1%)            |
| COVID-19 Hospital admission | 16295 (0.9%)   | 2377 (0.8%)      | 9192 (0.2%)       | 4944 (0.2%)         |
| COVID-19 Positive test      | 133384 (7.6%)  | 20780 (7.2%)     | 332340 (6.9%)     | 79957 (3.5%)        |
| BMI, mean (SD)              | 25.33 (5.37)   | 25.71 (5.80)     | 26.71 (5.65)      | 27.68 (5.38)        |
| Type 2 Diabetes             | 75888 (4.3%)   | 15173 (5.3%)     | 278274 (5.8%)     | 324883 (14.1%)      |
| Type 1 Diabetes             | 7246 (0.4%)    | 1497 (0.5%)      | 29944 (0.6%)      | 21139 (0.9%)        |
| Cardiovascular disease      | 75056 (4.3%)   | 13444 (4.7%)     | 186605 (3.9%)     | 330480 (14.4%)      |
| Hypertension                | 181574 (10.3%) | 32376 (11.3%)    | 667213 (13.8%)    | 911121 (39.7%)      |
| Age, mean (SD)              | 43.96 (18.20)  | 42.14 (18.07)    | 47.79 (15.40)     | 68.09 (14.67)       |
| Sex (Men)                   | 919670 (52.3%) | 136336 (47.5%)   | 2264859 (46.9%)   | 991458 (43.2%)      |
| Ethnicity                   |                |                  |                   |                     |
| White                       | 975521 (55.5%) | 167058 (58.2%)   | 3231236 (66.9%)   | 1696838 (73.9%)     |
| Asian                       | 167194 (9.5%)  | 32276 (11.2%)    | 375199 (7.8%)     | 101545 (4.4%)       |
| Black                       | 132539 (7.5%)  | 18606 (6.5%)     | 137527 (2.8%)     | 32009 (1.4%)        |
| Chinese                     | 38537 (2.2%)   | 1695 (0.6%)      | 34860 (0.7%)      | 7295 (0.3%)         |
| Others/not recorded         | 444898 (25.3%) | 67611 (23.5%)    | 1049505 (21.7%)   | 459575 (20.0%)      |
| Quintile of Townsend        |                |                  |                   |                     |
| 1                           | 209124 (11.9%) | 42364 (14.7%)    | 1220065 (25.3%)   | 795683 (34.6%)      |
| 2                           | 249925 (14.2%) | 49125 (17.1%)    | 1104953 (22.9%)   | 604002 (26.3%)      |
| 3                           | 334505 (19.0%) | 59086 (20.6%)    | 955548 (19.8%)    | 421198 (18.3%)      |
| 4                           | 422064 (24.0%) | 66237 (23.1%)    | 814316 (16.9%)    | 283390 (12.3%)      |
| 5                           | 535931 (30.5%) | 68758 (23.9%)    | 707464 (14.7%)    | 186042 (8.1%)       |
| Missing/not recorded        | 7140 (0.4%)    | 1676 (0.6%)      | 25981 (0.5%)      | 6947 (0.3%)         |
| Region                      |                |                  |                   |                     |
| East Midlands               | 78947 (4.5%)   | 10422 (3.6%)     | 212799 (4.4%)     | 97108 (4.2%)        |
| East of England             | 79396 (4.5%)   | 13402 (4.7%)     | 279383 (5.8%)     | 143397 (6.2%)       |
| London                      | 659336 (37.5%) | 79571 (27.7%)    | 1028853 (21.3%)   | 374418 (16.3%)      |
| North East                  | 52943 (3.0%)   | 9457 (3.3%)      | 154706 (3.2%)     | 77564 (3.4%)        |
| North West                  | 241166 (13.7%) | 52651 (18.3%)    | 787263 (16.3%)    | 428724 (18.7%)      |
| South Central               | 148945 (8.5%)  | 28277 (9.8%)     | 627140 (13.0%)    | 289618 (12.6%)      |
| South East                  | 126599 (7.2%)  | 24807 (8.6%)     | 500608 (10.4%)    | 245263 (10.7%)      |
| South West                  | 123909 (7.0%)  | 24299 (8.5%)     | 499147 (10.3%)    | 256068 (11.1%)      |
| West Midlands               | 173454 (9.9%)  | 32847 (11.4%)    | 513227 (10.6%)    | 266241 (11.6%)      |
| Yorkshire & Humber          | 73994 (4.2%)   | 11513 (4.0%)     | 225201 (4.7%)     | 118861 (5.2%)       |
| Smoking                     |                |                  |                   |                     |
| Non smoker                  | 944917 (53.7%) | 146028 (50.8%)   | 2910178 (60.3%)   | 1344139 (58.5%)     |
| Ex-smoker                   | 292736 (16.6%) | 45613 (15.9%)    | 1031504 (21.4%)   | 732922 (31.9%)      |
| Light smoker                | 354217 (20.1%) | 60439 (21.0%)    | 628371 (13.0%)    | 161733 (7.0%)       |
| Moderate smoker             | 71184 (4.0%)   | 12960 (4.5%)     | 134263 (2.8%)     | 34368 (1.5%)        |
| Heavy smoker                | 32101 (1.8%)   | 6043 (2.1%)      | 63729 (1.3%)      | 17700 (0.8%)        |
| Missing/not recorded        | 63534 (3.6%)   | 16163 (5.6%)     | 60282 (1.2%)      | 6400 (0.3%)         |

Supplementary Table 3. Percentage of population with one, two or three vaccine doses by BMI and age group

|                       | 18-39 y |    | 40-59 y |    | 60-79 y |    | 80+ y   |    |
|-----------------------|---------|----|---------|----|---------|----|---------|----|
| <b>Vaccine uptake</b> | n       | %  | n       | %  | n       | %  | n       | %  |
| <b>Underweight</b>    |         |    |         |    |         |    |         |    |
| No vaccine            | 82,731  | 37 | 13,008  | 26 | 3,987   | 14 | 4,762   | 27 |
| 1 <sup>st</sup> dose  | 16,709  | 7  | 2,057   | 4  | 826     | 3  | 711     | 4  |
| 2 <sup>nd</sup> dose  | 118,415 | 53 | 29,620  | 60 | 11,786  | 40 | 4,023   | 23 |
| 3 <sup>rd</sup> dose  | 6,348   | 3  | 4,954   | 10 | 12,522  | 43 | 8,278   | 47 |
| <b>Healthy weight</b> |         |    |         |    |         |    |         |    |
| No vaccine            | 485,563 | 35 | 227,562 | 20 | 61,258  | 9  | 43,358  | 17 |
| 1 <sup>st</sup> dose  | 75,419  | 5  | 30,954  | 3  | 8,741   | 1  | 6,234   | 2  |
| 2 <sup>nd</sup> dose  | 773,393 | 56 | 756,679 | 66 | 275,734 | 39 | 45,944  | 18 |
| 3 <sup>rd</sup> dose  | 57,965  | 4  | 131,861 | 12 | 362,439 | 51 | 166,109 | 63 |
| <b>Overweight</b>     |         |    |         |    |         |    |         |    |
| No vaccine            | 211,811 | 31 | 186,354 | 16 | 72,538  | 8  | 42,867  | 14 |
| 1 <sup>st</sup> dose  | 37,298  | 6  | 28,807  | 3  | 10,437  | 1  | 5,895   | 2  |
| 2 <sup>nd</sup> dose  | 393,700 | 58 | 783,757 | 68 | 363,279 | 38 | 49,157  | 17 |
| 3 <sup>rd</sup> dose  | 32,021  | 5  | 145,426 | 13 | 499,596 | 53 | 199,946 | 67 |
| <b>Obesity</b>        |         |    |         |    |         |    |         |    |
| No vaccine            | 117,843 | 26 | 117,444 | 13 | 60,682  | 8  | 26,921  | 16 |
| 1 <sup>st</sup> dose  | 26,261  | 6  | 23,159  | 3  | 10,087  | 1  | 3,615   | 2  |
| 2 <sup>nd</sup> dose  | 278,547 | 61 | 601,690 | 67 | 308,963 | 41 | 33,640  | 20 |
| 3 <sup>rd</sup> dose  | 31,749  | 7  | 148,687 | 17 | 382,099 | 50 | 107,262 | 62 |

Supplementary Table 4. Cox proportional hazards of vaccination across BMI groups

|                      | Underweight |               | Healthy weight |       | Overweight |               | Obesity |               |
|----------------------|-------------|---------------|----------------|-------|------------|---------------|---------|---------------|
|                      | HR          | 95%CI         | HR             | 95%CI | HR         | 95%CI         | HR      | 95%CI         |
| 1 <sup>st</sup> dose | 0.909       | (0.905-0.913) | 1              |       | 1.120      | (1.118-1.122) | 1.202   | (1.199-1.204) |
| 2 <sup>nd</sup> dose | 1.044       | (1.040-1.049) | 1              |       | 1.001      | (0.999-1.003) | 1.003   | (1.001-1.005) |
| 3 <sup>rd</sup> dose | 0.877       | (0.867-0.887) | 1              |       | 1.043      | (1.040-1.047) | 1.044   | (1.040-1.047) |

\*Stratified by age (10 year bands), adjusted for age, sex, ethnicity, Townsend, region, smoking, hypertension, T1/2Diabetes, CVD, carehome status



Supplementary Table 5. Vaccine effectiveness against COVID-19 Hospital admission using a case-control study design

| COVID-19<br>Hospital admission        | Underweight   |            |                | Healthy weight |            |                | Overweight    |            |                | Obesity       |            |                |
|---------------------------------------|---------------|------------|----------------|----------------|------------|----------------|---------------|------------|----------------|---------------|------------|----------------|
|                                       | N<br>controls | N<br>cases | OR (95%CI)     | N<br>controls  | N<br>cases | OR (95%CI)     | N<br>controls | N<br>cases | OR (95%CI)     | N<br>controls | N<br>cases | OR (95%CI)     |
| No vaccine                            | 3729          | 454        | 1.00           | 42159          | 4291       | 1.00           | 43801         | 5118       | 1.00           | 31673         | 6432       | 1.00           |
| 1 <sup>st</sup> dose (interval after) |               |            |                |                |            |                |               |            |                |               |            |                |
| 0-6                                   | 164           | 20         | 1.54 0.82 2.88 | 2986           | 247        | 1.35 1.13 1.60 | 3540          | 311        | 1.19 1.02 1.39 | 2316          | 292        | 1.02 0.88 1.20 |
| 7-13                                  | 150           | 35         | 3.38 2.06 5.55 | 2781           | 332        | 2.02 1.73 2.35 | 3480          | 500        | 2.08 1.83 2.37 | 2275          | 506        | 1.99 1.75 2.26 |
| 14-20                                 | 166           | 21         | 1.76 1.01 3.09 | 2415           | 277        | 1.74 1.48 2.04 | 2890          | 386        | 1.78 1.54 2.05 | 1895          | 435        | 1.91 1.67 2.19 |
| 21-27                                 | 129           | 17         | 1.23 0.65 2.34 | 1809           | 184        | 1.18 0.98 1.43 | 2144          | 180        | 0.80 0.66 0.97 | 1383          | 217        | 0.91 0.76 1.09 |
| 28+                                   | 623           | 63         | 0.67 0.48 0.94 | 6615           | 634        | 0.81 0.73 0.89 | 6670          | 696        | 0.69 0.62 0.76 | 4755          | 765        | 0.66 0.60 0.72 |
| 2 <sup>nd</sup> dose (interval after) |               |            |                |                |            |                |               |            |                |               |            |                |
| 0-6                                   | 83            | <5         | 0.10 0.01 0.74 | 981            | 38         | 0.33 0.23 0.47 | 886           | 27         | 0.20 0.13 0.31 | 592           | 33         | 0.22 0.15 0.33 |
| 7-13                                  | 79            | <5         | 0.26 0.07 0.95 | 1006           | 30         | 0.24 0.17 0.36 | 936           | 48         | 0.33 0.24 0.46 | 605           | 44         | 0.27 0.19 0.38 |
| 14+                                   | 2024          | 173        | 0.51 0.41 0.63 | 35386          | 2201       | 0.34 0.32 0.36 | 42116         | 3236       | 0.32 0.30 0.34 | 32903         | 4178       | 0.32 0.30 0.34 |
| 3 <sup>rd</sup> dose (interval after) |               |            |                |                |            |                |               |            |                |               |            |                |
| 0-6                                   | 35            | <5         | 0.28 0.08 0.99 | 821            | 24         | 0.11 0.07 0.17 | 1192          | 38         | 0.09 0.06 0.12 | 802           | 39         | 0.08 0.06 0.11 |
| 7-13                                  | 28            | <5         | 0.07 0.01 0.67 | 652            | 18         | 0.09 0.06 0.15 | 910           | 45         | 0.12 0.09 0.17 | 613           | 54         | 0.14 0.11 0.19 |
| 14+                                   | 72            | <5         | 0.05 0.01 0.39 | 1398           | 39         | 0.07 0.05 0.11 | 1894          | 68         | 0.08 0.06 0.10 | 1237          | 49         | 0.05 0.04 0.07 |

\*Cases and controls were matched by age, sex, calendar date, practice, region and carehome status; models were further adjusted for ethnicity, Townsend, smoking, hypertension, type 1 and type 2 diabetes and CVD

Supplementary Table 6. Vaccine effectiveness against COVID-19 death using a case-control study design

| COVID-19 Death                        | Underweight |         |                | Healthy weight |         |                | Overweight |         |                | Obesity    |         |                |
|---------------------------------------|-------------|---------|----------------|----------------|---------|----------------|------------|---------|----------------|------------|---------|----------------|
|                                       | N controls  | N cases | OR (95%CI)     | N controls     | N cases | OR (95%CI)     | N controls | N cases | OR (95%CI)     | N controls | N cases | OR (95%CI)     |
| No vaccine                            | 1145        | 318     | 1.00           | 17402          | 2684    | 1.00           | 22055      | 3266    | 1.00           | 15916      | 3865    | 1.00           |
| 1 <sup>st</sup> dose (interval after) |             |         |                |                |         |                |            |         |                |            |         |                |
| 0-6                                   | 146         | <5      | 0.01 0.00 1.04 | 2435           | 27      | 0.12 0.05 0.28 | 3145       | 23      | 0.05 0.02 0.13 | 2050       | 17      | 0.05 0.02 0.14 |
| 7-13                                  | 130         | 13      | 0.07 0.01 0.52 | 2213           | 97      | 0.33 0.17 0.63 | 2724       | 94      | 0.18 0.10 0.35 | 1757       | 76      | 0.12 0.06 0.24 |
| 14-20                                 | 93          | 22      | 0.23 0.03 1.53 | 1948           | 178     | 0.55 0.34 0.90 | 2413       | 132     | 0.19 0.10 0.36 | 1398       | 123     | 0.27 0.15 0.48 |
| 21-27                                 | 81          | 15      | 0.46 0.08 2.62 | 1337           | 140     | 0.46 0.26 0.83 | 1723       | 157     | 0.31 0.18 0.51 | 1089       | 115     | 0.37 0.23 0.59 |
| 28+                                   | 172         | 46      | 1.30 0.65 2.59 | 3503           | 375     | 0.70 0.55 0.88 | 4224       | 382     | 0.51 0.41 0.63 | 2562       | 330     | 0.37 0.29 0.45 |
| 2 <sup>nd</sup> dose (interval after) |             |         |                |                |         |                |            |         |                |            |         |                |
| 0-6                                   | 14          | 0       |                | 343            | <5      | 0.11 0.03 0.35 | 419        | 0       |                | 234        | 6       | 0.08 0.03 0.23 |
| 7-13                                  | 23          | 0       |                | 323            | 6       | 0.21 0.08 0.55 | 398        | <5      | 0.07 0.02 0.29 | 230        | 9       | 0.11 0.04 0.30 |
| 14+                                   | 252         | 46      | 0.60 0.36 0.98 | 5398           | 472     | 0.39 0.33 0.47 | 7452       | 606     | 0.30 0.25 0.35 | 5246       | 680     | 0.26 0.22 0.30 |
| 3 <sup>rd</sup> dose (interval after) |             |         |                |                |         |                |            |         |                |            |         |                |
| 0-6                                   | 6           | 0       |                | 195            | <5      | 0.03 0.01 0.10 | 254        | <5      | 0.02 0.00 0.07 | 165        | 0       |                |
| 7-13                                  | 7           | 0       |                | 163            | 0       |                | 258        | <5      | 0.01 0.00 0.05 | 134        | 6       | 0.04 0.02 0.10 |
| 14+                                   | 25          | 0       |                | 486            | 15      | 0.04 0.02 0.08 | 700        | 18      | 0.03 0.02 0.06 | 389        | 12      | 0.02 0.01 0.04 |

\*Cases and controls were matched by age, sex, calendar date, practice, region and carehome status; models were further adjusted for ethnicity, Townsend, smoking, hypertension, type 1 and type 2 diabetes and CVD

Supplementary Table 7. Vaccine effectiveness against COVID-19 positive test using a case-control study design

| COVID-19 Positive test                | Underweight |         |            | Healthy weight |         |            | Overweight |         |            | Obesity    |         |            |
|---------------------------------------|-------------|---------|------------|----------------|---------|------------|------------|---------|------------|------------|---------|------------|
|                                       | N controls  | N cases | OR (95%CI) | N controls     | N cases | OR (95%CI) | N controls | N cases | OR (95%CI) | N controls | N cases | OR (95%CI) |
| No vaccine                            | 108899      | 8944    | 1.00       | 765509         | 56824   | 1.00       | 467516     | 37766   | 1.00       | 322236     | 29850   | 1.00       |
| 1 <sup>st</sup> dose (interval after) |             |         |            |                |         |            |            |         |            |            |         |            |
| 0-6                                   | 3852        | 730     | 2.59       | 23179          | 4646    | 3.20       | 15409      | 3093    | 3.08       | 11087      | 2544    | 3.03       |
| 7-13                                  | 4785        | 959     | 2.87       | 26806          | 6104    | 3.80       | 17001      | 3980    | 3.88       | 11906      | 3266    | 3.89       |
| 14-20                                 | 5073        | 566     | 1.54       | 28419          | 3705    | 2.09       | 16944      | 2513    | 2.29       | 11463      | 2166    | 2.54       |
| 21-27                                 | 5284        | 533     | 1.34       | 29067          | 3484    | 1.88       | 16540      | 2029    | 1.83       | 11078      | 1586    | 1.87       |
| 28+                                   | 29416       | 3996    | 1.83       | 197368         | 27142   | 2.11       | 122511     | 16793   | 1.98       | 86920      | 12107   | 1.77       |
| 2 <sup>nd</sup> dose (interval after) |             |         |            |                |         |            |            |         |            |            |         |            |
| 0-6                                   | 4003        | 376     | 1.23       | 31699          | 3029    | 1.42       | 19904      | 1919    | 1.35       | 12890      | 1267    | 1.21       |
| 7-13                                  | 3506        | 216     | 0.80       | 31111          | 2246    | 1.06       | 20376      | 1775    | 1.20       | 13323      | 1191    | 1.10       |
| 14+                                   | 74526       | 5976    | 1.07       | 1063985        | 105545  | 1.44       | 972248     | 106711  | 1.48       | 805350     | 90717   | 1.33       |
| 3 <sup>rd</sup> dose (interval after) |             |         |            |                |         |            |            |         |            |            |         |            |
| 0-6                                   | 582         | 45      | 0.90       | 14522          | 1214    | 1.09       | 16793      | 1607    | 1.14       | 14014      | 1406    | 1.06       |
| 7-13                                  | 443         | 19      | 0.43       | 11025          | 771     | 0.88       | 12751      | 1022    | 0.91       | 10326      | 847     | 0.83       |
| 14+                                   | 1114        | 43      | 0.45       | 25170          | 1142    | 0.54       | 26543      | 1172    | 0.47       | 21968      | 879     | 0.38       |

\*Cases and controls were matched by age, sex, calendar date, practice, region and carehome status; models were further adjusted for ethnicity, Townsend, smoking, hypertension, type 1 and type 2 diabetes and CVD

Supplementary Figure 2. Risk of COVID-19 positive test after vaccination

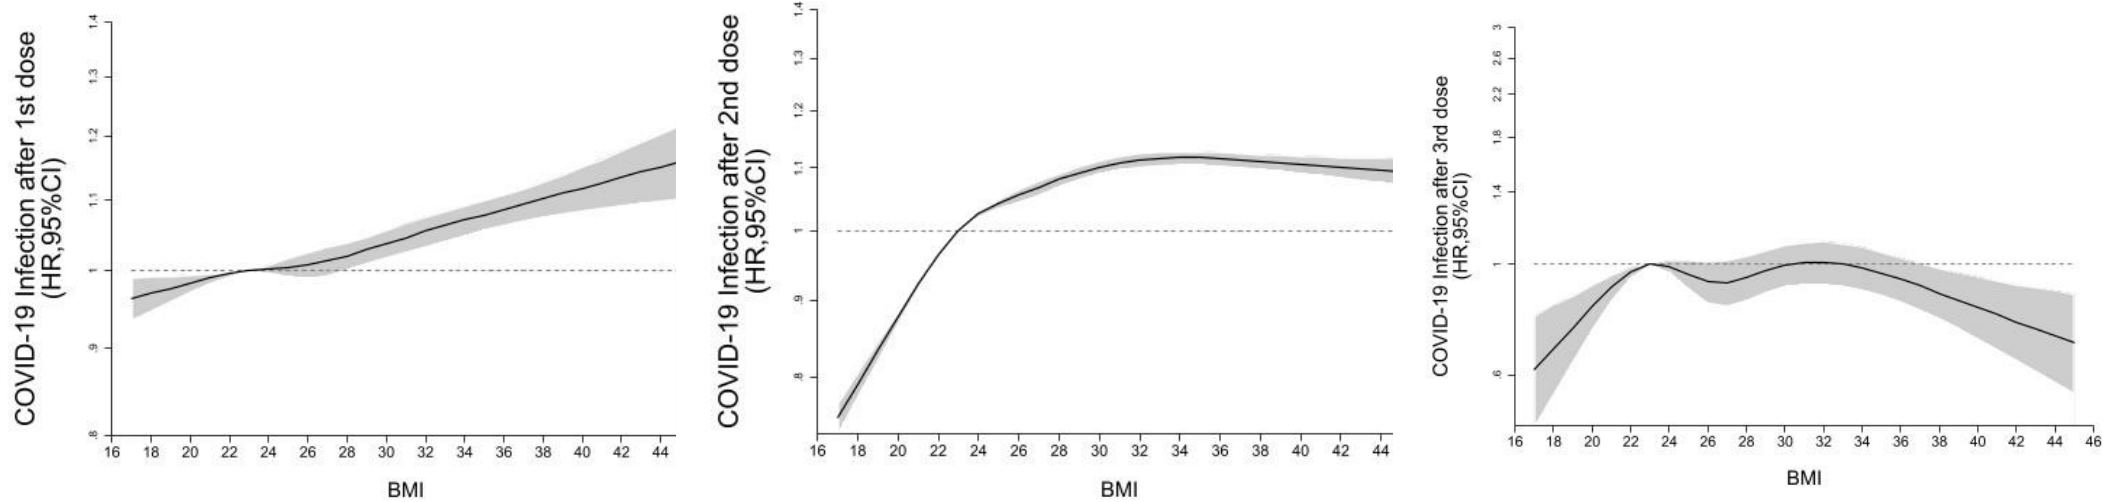

\* Estimates of risk after 14 days from each vaccine dose. Adjusted for age, calendar week, sex, ethnicity, Townsend, region, smoking, hypertension, T1/2Diabetes, CVD, carehome status

Supplementary Figure 3. Sensitivity analysis of vaccine effectiveness against COVID-19 hospital admission and death among people with recent BMI measurements

### COVID-19 Hospital admission

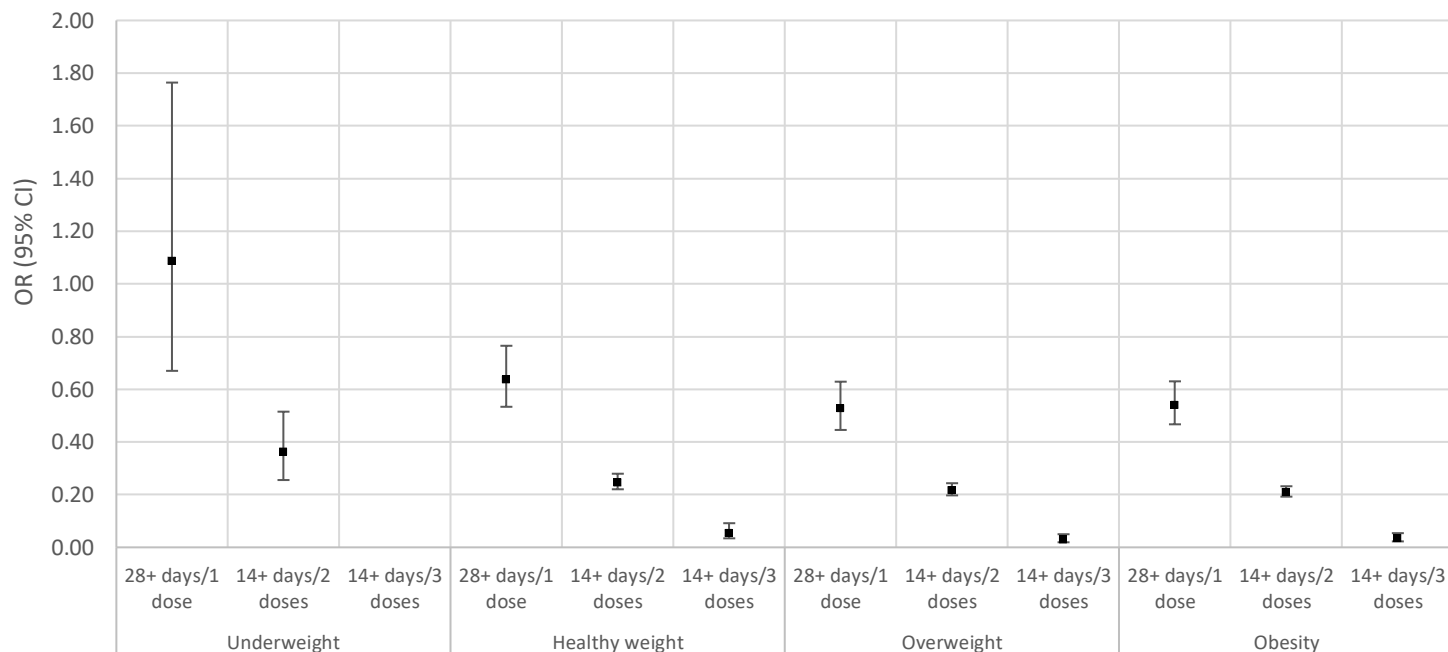

### COVID-19 Death

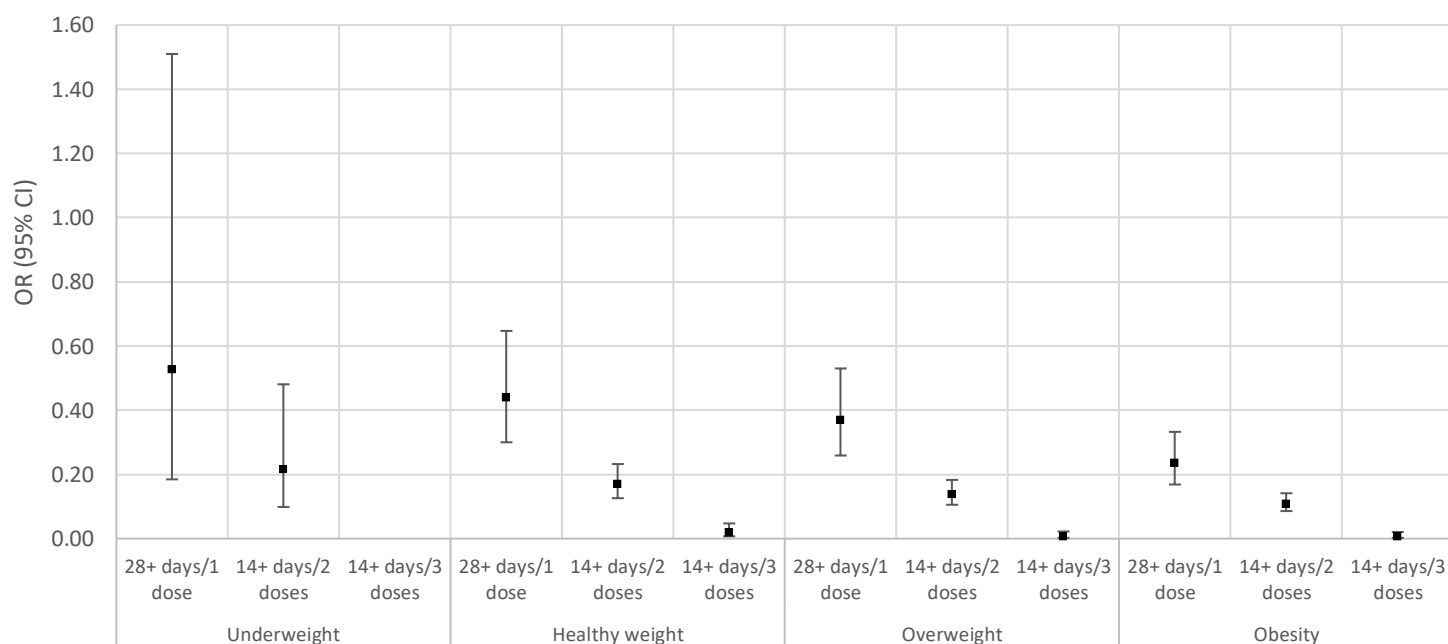

\*Cases and controls were matched by age, sex, calendar date, practice, region and carehome status; models were further adjusted for ethnicity, Townsend, smoking, hypertension, type 1 and type 2 diabetes and CVD

Supplementary Figure 4. Sensitivity analysis of vaccine effectiveness against COVID-19 hospital admission and death excluding people living in care homes

### COVID-19 Hospital admission

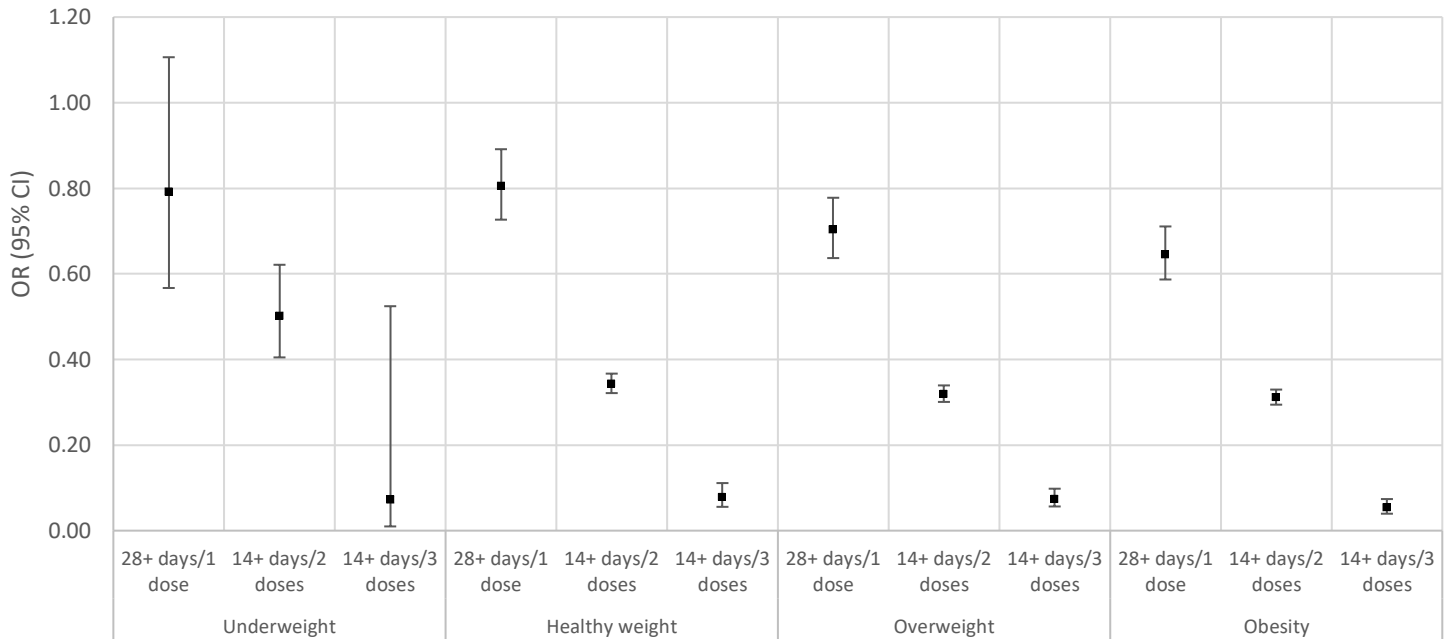

### COVID-19 Death

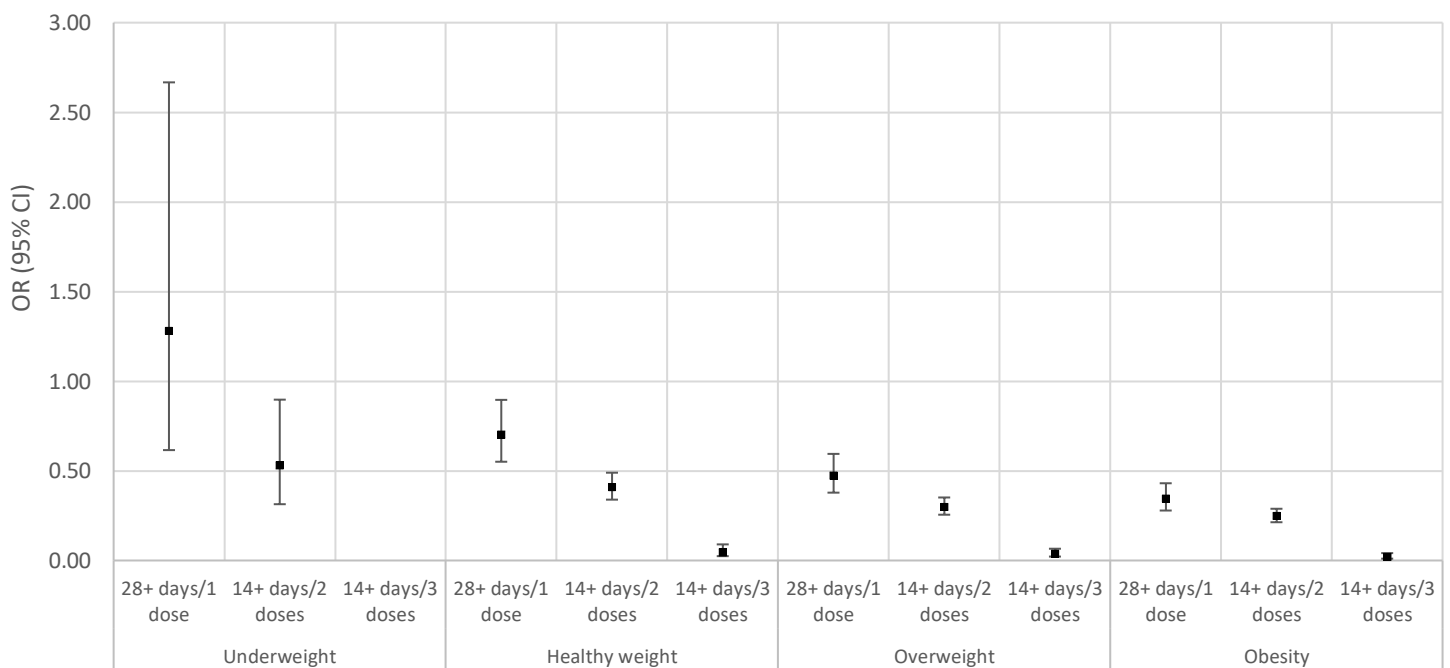

\*Cases and controls were matched by age, sex, calendar date, practice, region and carehome status; models were further adjusted for ethnicity, Townsend, smoking, hypertension, type 1 and type 2 diabetes and CVD

Supplementary Figure 5. Sensitivity analysis of risk of severe COVID-19 outcomes after vaccination among people with recent BMI measurements

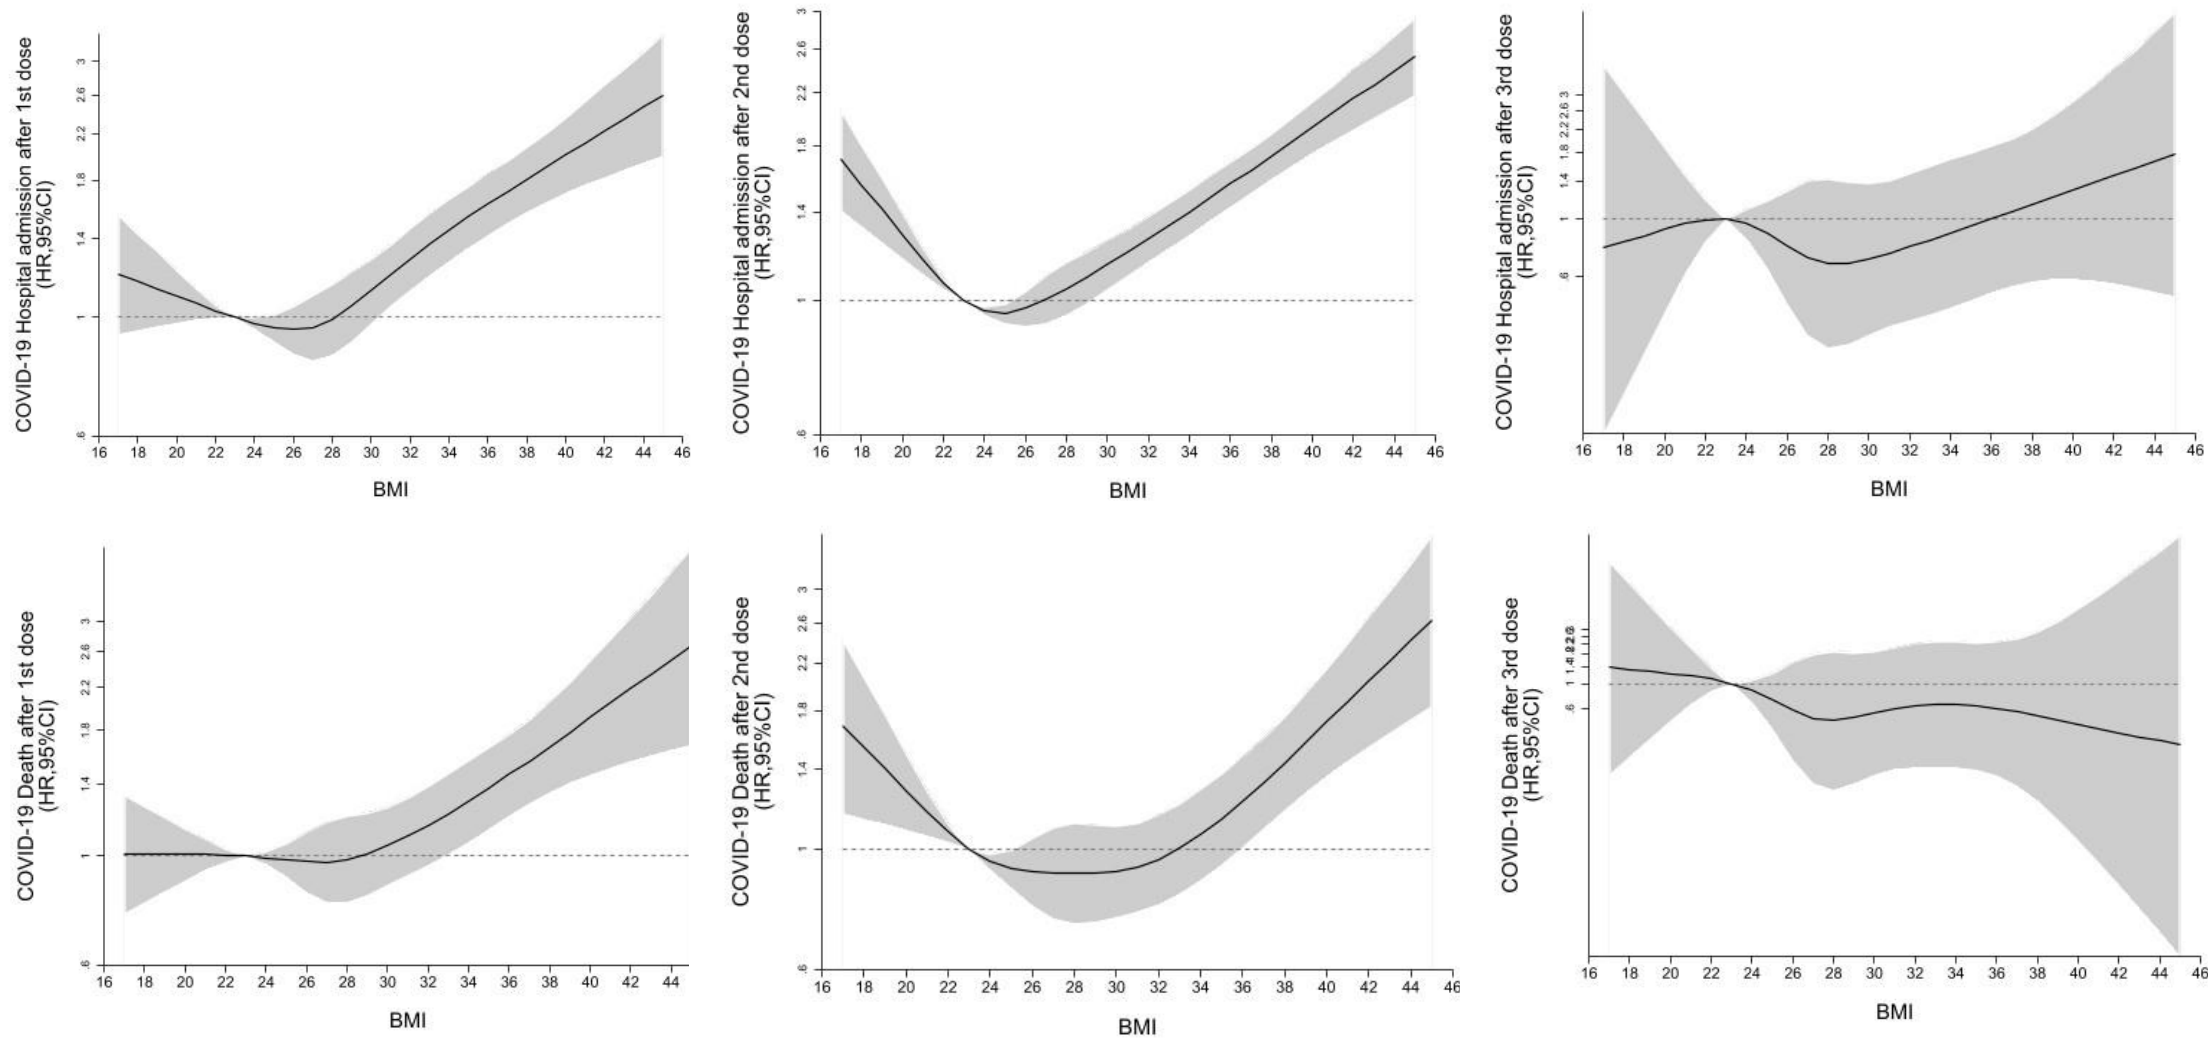

\*Estimates of risk after 14 days from each vaccine dose. Adjusted for age, calendar week, sex, ethnicity, Townsend, region, smoking, hypertension, T1/2Diabetes, CVD, carehome status

Supplementary Figure 6. Sensitivity analysis of risk of severe COVID-19 outcomes after vaccination excluding people living in care homes

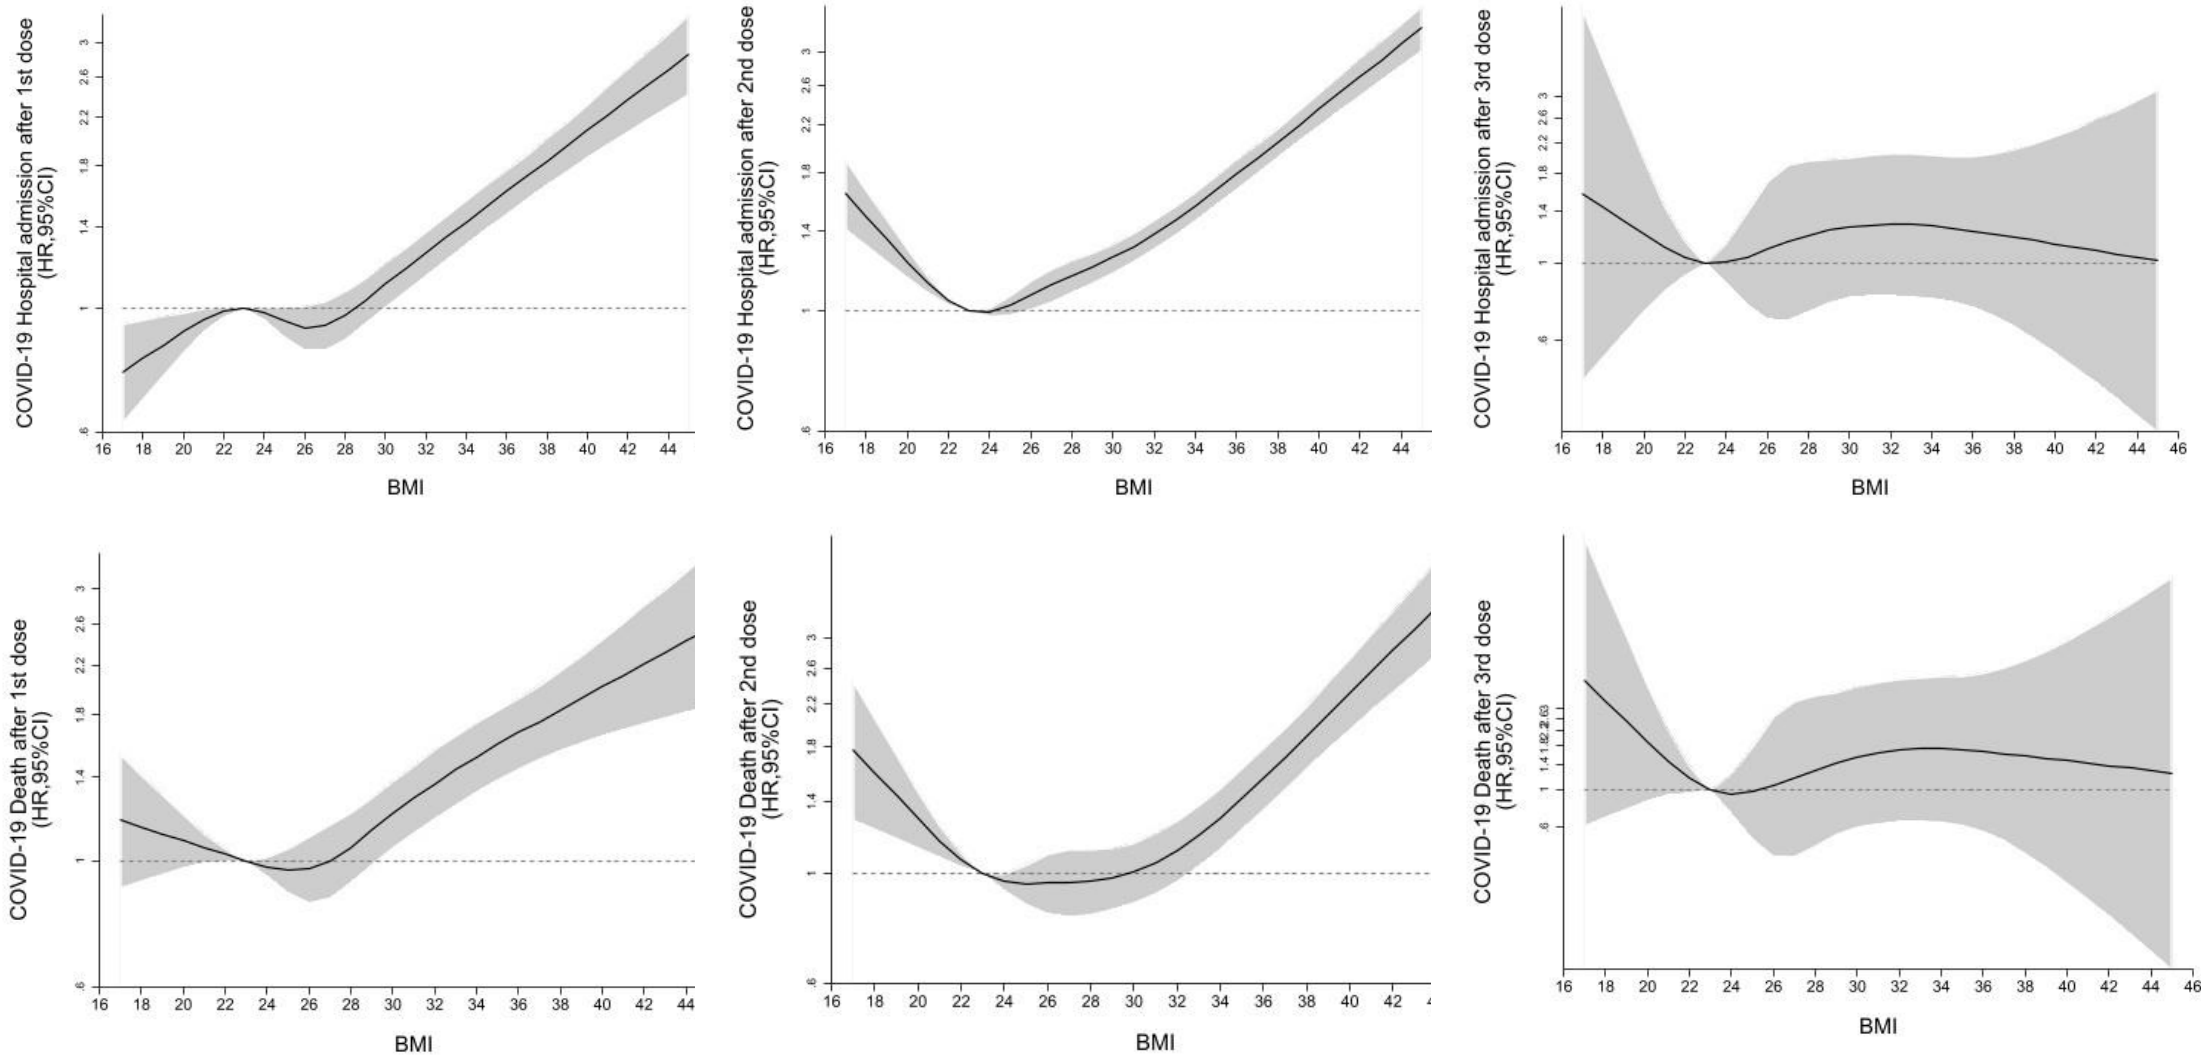

\*Estimates of risk after 14 days from each vaccine dose. Adjusted for age, calendar week, sex, ethnicity, Townsend, region, smoking, hypertension, T1/2Diabetes, CVD, carehome status
